# Supplementary material for: Avalanche size estimation and avalanche outline determination by experts: reliability and implications for practice
Source: Copernicus journal article supplement (doi:10.5194/nhess-23-2895-2023), 2023-08-30
Supplement: Supplementary file 1 [file nhess-23-2895-2023-supplement.pdf]

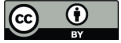

*Supplement of*

**Avalanche size estimation and avalanche outline determination by experts: reliability and implications for practice**

**Elisabeth D. Hafner et al.**

*Correspondence to:* Elisabeth D. Hafner ([elisabeth.hafner@slf.ch](mailto:elisabeth.hafner@slf.ch))

The copyright of individual parts of the supplement might differ from the article licence.

Structure of the survey sent to the forecasters. Question 1 was asked 10 times for each avalanche part of the survey. The survey was created with ArcGIS Survey123.

## Survey Avalanche size assessment

version US/Canada

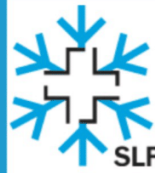

WSL Institute for Snow  
and Avalanche Research SLF

With this survey we would like to find out how consistently "experts" assess avalanche size. We have prepared eleven questions that will take no more than 10 minutes to answer

**Let's go!**

### In what role do you deal with avalanches?\*

Avalanche warner

Mountain guide,  
tour leader or  
similar

Observer SLF

Other

### In which of the following countries do you work for the avalanche warning?\*

If you work as an avalanche warner in a country that is part of the EAWS please use [this survey](#) instead.

Unites States

Canada

other

## Question 1

How big would you estimate this avalanche to be?\*

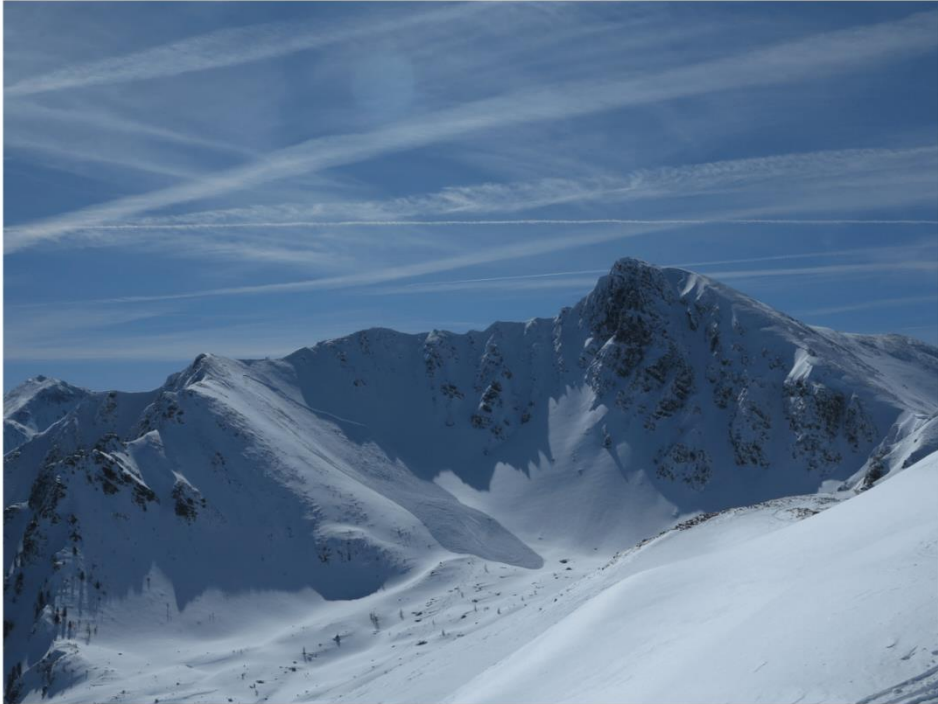

small avalanche  
(size 1)

medium  
avalanche (size 2)

large avalanche  
(size 3)

very large  
avalanche (size 4)

extremely large  
avalanche (size 5)

do not know

Would you have liked to give an intermediate size?\*

Yes

No

Which one?\*

-Please select-

Size 1 to 2

Size 2 to 3

Size 3 to 4

Size 4 to 5

## Question 11

**How important were the following criteria for you to estimate the avalanche size from the photos?**

(criteria in alphabetic order)

|                               | very important        | important             | less important        | not at all important  |
|-------------------------------|-----------------------|-----------------------|-----------------------|-----------------------|
| <b>Avalanche dimensions*</b>  | <input type="radio"/> | <input type="radio"/> | <input type="radio"/> | <input type="radio"/> |
| <b>Destructive potential*</b> | <input type="radio"/> | <input type="radio"/> | <input type="radio"/> | <input type="radio"/> |
| <b>Run out*</b>               | <input type="radio"/> | <input type="radio"/> | <input type="radio"/> | <input type="radio"/> |
| <b>Volume*</b>                | <input type="radio"/> | <input type="radio"/> | <input type="radio"/> | <input type="radio"/> |

[Back](#)

[Submit](#)
